# Supplementary material for: Evaluating processes of care and outcomes of children in hospital (EPOCH): study protocol for a randomized controlled trial
Source: Springer Nature journal article supplement (doi:10.1186/s13063-015-0712-3), 2015-06-02
Supplement: MOESM1 [file 9782056]

Figure 1

# Project timelines, study measurements & personnel

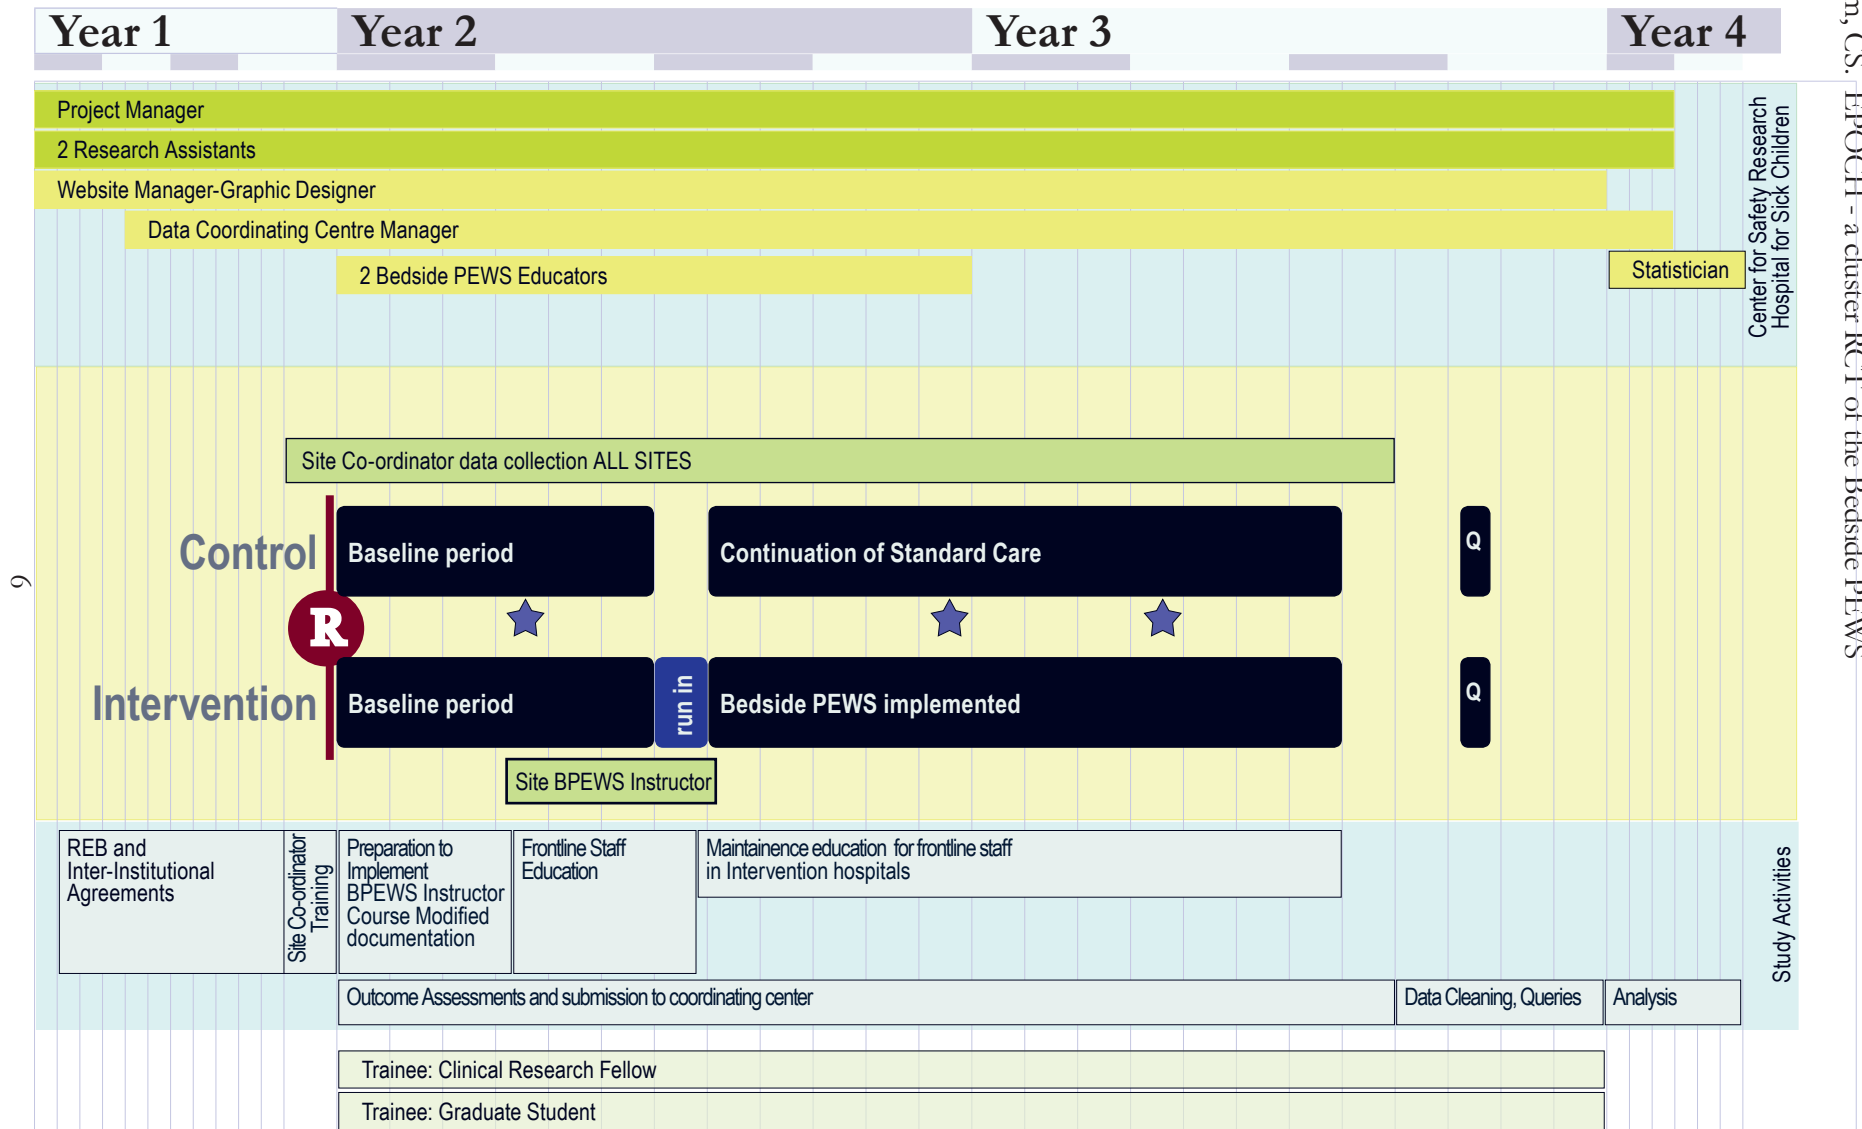

- ★ Documentation-Interaction Survey and Documentation Review
- Q Post-randomization period survey of Administrator and Site Investigator to describe insitutional intent
